# Supplementary material for: Impacts Of Agricultural Machine Renting on Cereal Crop Productivity and Commercialization in West Gojjam Zone, Ethiopia
Source: Research Square preprint supplement (doi:10.21203/rs.3.rs-4559026/v1), 2024-07-31
Supplement: Supplementary file 1 [file 853424fe80b60e815230ddd3.docx]

APPENDIX

1. Second Stage of ESR for total factor productivity

**Linear regression**

| TFP | Coef. | | St.Err. | t-value | | p-value | [95% Conf | | Interval] | | Sig |
| --- | --- | --- | --- | --- | --- | --- | --- | --- | --- | --- | --- |
| age_hh | .023 | | .007 | 3.13 | | .002 | .009 | | .037 | | *** |
| Edu | -.016 | | .023 | -0.72 | | .473 | -.062 | | .029 | |  |
| adult_eq | -.009 | | .04 | -0.22 | | .829 | -.088 | | .071 | |  |
| power_far | -.006 | | .133 | -0.04 | | .966 | -.268 | | .257 | |  |
| mkt_dis | .001 | | .035 | 0.02 | | .983 | -.068 | | .07 | |  |
| road_dis | .037 | | .05 | 0.75 | | .457 | -.061 | | .135 | |  |
| de_vdis | -.098 | | .057 | -1.71 | | .09 | -.211 | | .015 | | * |
| mem_co | .074 | | .122 | 0.60 | | .548 | -.168 | | .315 | |  |
| Credit | -.092 | | .116 | -0.79 | | .428 | -.32 | | .137 | |  |
| Toland | -.028 | | .072 | -0.38 | | .704 | -.171 | | .115 | |  |
| Tlu | .019 | | .028 | 0.69 | | .494 | -.036 | | .074 | |  |
| no_ox | .111 | | .095 | 1.16 | | .248 | -.078 | | .299 | |  |
| Offfarm | -.181 | | .11 | -1.64 | | .103 | -.398 | | .037 | |  |
| mills1 | .331 | | .269 | 1.23 | | .22 | -.199 | | .861 | |  |
| Constant | 2.064 | | .583 | 3.54 | | .001 | .914 | | 3.215 | | *** |
|  | | | | | | | | | | | |
| Mean dependent var | | 3.103 | | | SD dependent var | | | 0.681 | |
| R-squared | | 0.178 | | | Number of obs | | | 192 | |
| F-test | | 2.746 | | | Prob > F | | | 0.001 | |
| Akaike crit. (AIC) | | 388.394 | | | Bayesian crit. (BIC) | | | 437.256 | |

**Linear regression**

| TFP | Coef. | | St.Err. | t-value | | p-value | [95% Conf | | Interval] | | Sig |
| --- | --- | --- | --- | --- | --- | --- | --- | --- | --- | --- | --- |
| age_hh | .023 | | .009 | 2.59 | | .01 | .005 | | .04 | | ** |
| Edu | .021 | | .02 | 1.05 | | .296 | -.018 | | .06 | |  |
| adult_eq | -.076 | | .044 | -1.75 | | .081 | -.162 | | .009 | | * |
| power_far | .085 | | .133 | 0.64 | | .525 | -.177 | | .346 | |  |
| mkt_dis | -.083 | | .023 | -3.60 | | 0 | -.129 | | -.038 | | *** |
| road_dis | .074 | | .047 | 1.57 | | .117 | -.019 | | .168 | |  |
| de_vdis | .071 | | .052 | 1.38 | | .17 | -.031 | | .173 | |  |
| mem_co | .135 | | .127 | 1.07 | | .287 | -.115 | | .385 | |  |
| Credit | -.061 | | .108 | -0.56 | | .575 | -.274 | | .153 | |  |
| Toland | -.008 | | .089 | -0.08 | | .933 | -.183 | | .168 | |  |
| Tlu | .081 | | .029 | 2.85 | | .005 | .025 | | .138 | | *** |
| no_ox | .063 | | .091 | 0.70 | | .487 | -.116 | | .242 | |  |
| Offfarm | .013 | | .094 | 0.13 | | .893 | -.173 | | .198 | |  |
| mills2 | .668 | | .284 | 2.35 | | .02 | .108 | | 1.229 | | ** |
| Constant | 1.508 | | .403 | 3.74 | | 0 | .713 | | 2.304 | | *** |
|  | | | | | | | | | | | |
| Mean dependent var | | 2.710 | | | SD dependent var | | | 0.648 | |
| R-squared | | 0.197 | | | Number of obs | | | 208 | |
| F-test | | 3.387 | | | Prob > F | | | 0.000 | |
| Akaike crit. (AIC) | | 393.180 | | | Bayesian crit. (BIC) | | | 443.243 | |

1. Second Stage of ESR for COIM

**Linear regression**

| COIM | Coef. | | St.Err. | t-value | | p-value | [95% Conf | | Interval] | | Sig |
| --- | --- | --- | --- | --- | --- | --- | --- | --- | --- | --- | --- |
| age_hh | 0 | | .001 | 0.32 | | .748 | -.002 | | .003 | |  |
| Edu | .001 | | .003 | 0.35 | | .728 | -.006 | | .008 | |  |
| adult_eq | .003 | | .006 | 0.48 | | .634 | -.009 | | .015 | |  |
| power_far | -.002 | | .02 | -0.12 | | .903 | -.041 | | .037 | |  |
| mkt_dis | .005 | | .005 | 1.05 | | .294 | -.005 | | .016 | |  |
| road_dis | 0 | | .007 | 0.03 | | .978 | -.014 | | .015 | |  |
| de_vdis | -.014 | | .009 | -1.62 | | .106 | -.031 | | .003 | |  |
| mem_co | .034 | | .018 | 1.88 | | .062 | -.002 | | .07 | | * |
| Credit | .018 | | .017 | 1.07 | | .285 | -.016 | | .053 | |  |
| Toland | .021 | | .011 | 1.95 | | .052 | 0 | | .042 | | * |
| Tlu | .002 | | .004 | 0.58 | | .565 | -.006 | | .01 | |  |
| no_ox | .005 | | .014 | 0.38 | | .701 | -.023 | | .034 | |  |
| Offfarm | 0 | | .016 | -0.01 | | .994 | -.033 | | .032 | |  |
| mills1 | -.02 | | .04 | -0.51 | | .609 | -.099 | | .058 | |  |
| Constant | .417 | | .087 | 4.80 | | 0 | .246 | | .588 | | *** |
|  | | | | | | | | | | | |
| Mean dependent var | | 0.573 | | | SD dependent var | | | 0.101 | |
| R-squared | | 0.168 | | | Number of obs | | | 192 | |
| F-test | | 2.550 | | | Prob > F | | | 0.002 | |
| Akaike crit. (AIC) | | -342.918 | | | Bayesian crit. (BIC) | | | -294.055 | |
| **** p<.01, ** p<.05, * p<.1* | | | | | | | | | | | |

| COIM | Coef. | | St.Err. | t-value | | p-value | [95% Conf | | Interval] | | Sig |
| --- | --- | --- | --- | --- | --- | --- | --- | --- | --- | --- | --- |
| age_hh | .001 | | .002 | 0.80 | | .423 | -.002 | | .004 | |  |
| Edu | .007 | | .004 | 1.99 | | .048 | 0 | | .014 | | ** |
| adult_eq | -.018 | | .008 | -2.36 | | .019 | -.034 | | -.003 | | ** |
| power_far | -.013 | | .024 | -0.56 | | .579 | -.06 | | .034 | |  |
| mkt_dis | -.002 | | .004 | -0.37 | | .712 | -.01 | | .007 | |  |
| road_dis | .012 | | .009 | 1.36 | | .177 | -.005 | | .028 | |  |
| de_vdis | -.017 | | .009 | -1.87 | | .063 | -.036 | | .001 | | * |
| mem_co | -.022 | | .023 | -0.95 | | .343 | -.067 | | .023 | |  |
| Credit | -.003 | | .019 | -0.18 | | .858 | -.042 | | .035 | |  |
| Toland | .065 | | .016 | 4.03 | | 0 | .033 | | .096 | | *** |
| Tlu | .015 | | .005 | 2.84 | | .005 | .004 | | .025 | | *** |
| no_ox | .018 | | .016 | 1.13 | | .262 | -.014 | | .05 | |  |
| Offfarm | .021 | | .017 | 1.24 | | .217 | -.012 | | .054 | |  |
| mills2 | .108 | | .051 | 2.12 | | .035 | .007 | | .209 | | ** |
| Constant | .301 | | .072 | 4.16 | | 0 | .158 | | .444 | | *** |
|  | | | | | | | | | | | |
| Mean dependent var | | 0.445 | | | SD dependent var | | | 0.122 | |
| R-squared | | 0.265 | | | Number of obs | | | 208 | |
| F-test | | 4.967 | | | Prob > F | | | 0.000 | |
| Akaike crit. (AIC) | | -320.787 | | | Bayesian crit. (BIC) | | | -270.724 | |
| **** p<.01, ** p<.05, * p<.1* | | | | | | | | | | | |

1. Second Stage of ESR for TE

**Linear regression**

| Te | Coef. | | St.Err. | t-value | | p-value | [95% Conf | | Interval] | | Sig |
| --- | --- | --- | --- | --- | --- | --- | --- | --- | --- | --- | --- |
| age_hh | .001 | | .001 | 0.69 | | .492 | -.002 | | .003 | |  |
| Edu | -.006 | | .004 | -1.68 | | .094 | -.014 | | .001 | | * |
| adult_eq | .001 | | .006 | 0.15 | | .883 | -.011 | | .013 | |  |
| power_far | .012 | | .021 | 0.56 | | .578 | -.03 | | .053 | |  |
| mkt_dis | .002 | | .005 | 0.47 | | .638 | -.007 | | .012 | |  |
| road_dis | -.01 | | .007 | -1.43 | | .154 | -.025 | | .004 | |  |
| de_vdis | .005 | | .008 | 0.57 | | .571 | -.012 | | .021 | |  |
| mem_co | .003 | | .018 | 0.16 | | .87 | -.033 | | .039 | |  |
| ext_visit | -.002 | | .001 | -1.46 | | .146 | -.005 | | .001 | |  |
| Credit | .022 | | .018 | 1.21 | | .226 | -.014 | | .057 | |  |
| Toland | -.026 | | .012 | -2.09 | | .038 | -.05 | | -.001 | | ** |
| Tlu | .003 | | .004 | 0.65 | | .519 | -.006 | | .011 | |  |
| no_ox | -.009 | | .017 | -0.51 | | .611 | -.043 | | .025 | |  |
| Offfarm | -.026 | | .015 | -1.67 | | .097 | -.056 | | .005 | | * |
| mills1 | -.075 | | .055 | -1.37 | | .173 | -.184 | | .033 | |  |
| Constant | .968 | | .118 | 8.18 | | 0 | .735 | | 1.201 | | *** |
|  | | | | | | | | | | | |
| Mean dependent var | | 0.846 | | | SD dependent var | | | 0.090 | |
| R-squared | | 0.106 | | | Number of obs | | | 192 | |
| F-test | | 1.397 | | | Prob > F | | | 0.153 | |
| Akaike crit. (AIC) | | -368.412 | | | Bayesian crit. (BIC) | | | -316.292 | |
| **** p<.01, ** p<.05, * p<.1* | | | | | | | | | | | |

**Linear regression**

| Te | Coef. | | St.Err. | t-value | | p-value | [95% Conf | | Interval] | | Sig |
| --- | --- | --- | --- | --- | --- | --- | --- | --- | --- | --- | --- |
| age_hh | .004 | | .002 | 2.22 | | .028 | 0 | | .007 | | ** |
| Edu | .011 | | .004 | 2.69 | | .008 | .003 | | .018 | | *** |
| adult_eq | -.021 | | .008 | -2.78 | | .006 | -.037 | | -.006 | | *** |
| power_far | -.018 | | .024 | -0.75 | | .454 | -.065 | | .029 | |  |
| mkt_dis | -.015 | | .004 | -3.68 | | 0 | -.022 | | -.007 | | *** |
| road_dis | .025 | | .008 | 3.05 | | .003 | .009 | | .042 | | *** |
| de_vdis | -.007 | | .009 | -0.77 | | .44 | -.024 | | .011 | |  |
| mem_co | .026 | | .022 | 1.17 | | .245 | -.018 | | .069 | |  |
| ext_visit | .003 | | .002 | 1.73 | | .086 | 0 | | .007 | | * |
| Credit | -.016 | | .021 | -0.76 | | .449 | -.056 | | .025 | |  |
| Toland | .011 | | .018 | 0.64 | | .521 | -.024 | | .047 | |  |
| Tlu | .009 | | .005 | 1.71 | | .09 | -.001 | | .018 | | * |
| no_ox | .038 | | .018 | 2.09 | | .038 | .002 | | .073 | | ** |
| Offfarm | .019 | | .015 | 1.26 | | .211 | -.011 | | .05 | |  |
| mills2 | .185 | | .065 | 2.84 | | .005 | .056 | | .313 | | *** |
| Constant | .6 | | .069 | 8.72 | | 0 | .464 | | .736 | | *** |
|  | | | | | | | | | | | |
| Mean dependent var | | 0.772 | | | SD dependent var | | | 0.106 | |
| R-squared | | 0.198 | | | Number of obs | | | 208 | |
| F-test | | 3.152 | | | Prob > F | | | 0.000 | |
| Akaike crit. (AIC) | | -358.443 | | | Bayesian crit. (BIC) | | | -305.043 | |
| **** p<.01, ** p<.05, * p<.1* | | | | | | | | | | | |
